# Supplementary material
Source: publisher figshare collection journal article supplement (https://tandf.figshare.com/ndownloader/files/14133620)
Supplement: Supplementary file 1 [file 14133620]

## Supplemental File – Job Matching in Connected Regional and Occupational Labor Markets

### ARTICLE HISTORY

Compiled December 4, 2018

### Appendix A. Model of Non-sequential Search

The ‘bulletin board’ model proposed by Hall (1979) and Pissarides (1979) describes non-sequential job search. In the following, we combine the version by Burda and Profit (1996), which incorporates the influence of the unemployed and vacancies from nearby local labor markets, with the version by Stops (2014), which considers mobility between different occupational markets. Thus, our model is able to explain the possible direct and indirect effects of the number of unemployed and vacancies in other regions, other similar occupations, and other similar occupations in other regions.

Consider an economy that is divided into  $L$  regions, where it is possible to be employed in one of  $I$  occupations. The regions and occupations are indexed by  $l = 1, \dots, L$  and  $i = 1, \dots, I$ . Within each region  $l$  and occupation  $i$  there are  $u_{il}$  identical unemployed workers and  $v_{il}$  identical firms. Each firm searches for one worker to employ. In the center of each region, there is an employment office that gathers information on all vacancies in all occupations and regions, which then brings workers and firms together. All offices receive and publish the same information at the same time, due to, e.g., the existence of supra-regional Internet-based information services. The unemployed workers apply for jobs in their occupation  $i$  or in another occupation  $j \neq i$ , the application can be sent either to the employment office in their residence region  $l$  or to another region  $m \neq l$ . Moreover, the workers decide about their search intensity  $N_{ijlm}$ , which can be measured by the number of applications sent for each occupation to each regional employment center.

Each application is a random draw and is associated with search costs  $c + aD_{lm} + bD_{ij}$ , where  $c$ ,  $a$  and  $b$  are positive constants.  $D_{lm}$  is the distance between the employment offices in the regions  $l$  and  $m$ .  $D_{ij}$  is the content dissimilarity between the current occupation of the unemployed and the occupation she applies for. Thus, the search costs linearly depend both on the net costs of applying to different regions, as well as on the costs of gathering information to apply to another occupation. The search costs are minimum ( $= c$ ) if an application is made within the current region of residence and the current occupation, i.e.,  $D_{lm} = 0$  and  $D_{ij} = 0$ .

Following a successful search, the worker is employed in region  $m$  in occupation  $j$  and receives wage  $w$  adjusted by the interest rate  $r$ .

Given the current geographical location of the worker  $l$  and her current occupation  $i$ , she decides on the number of interviews in each region  $m$  and occupation  $j$ . The worker knows about the probability,  $f_{jm}$ , of getting a job in region  $m$  and occupation  $j$ . The decision on the optimal number of interviews is yielded from maximization of net total expected benefit from the search:

$$\underbrace{\left[1 - (1 - f_{jm})^{N_{ijlm}}\right] \frac{w}{r}}_{\text{total expected benefit}} - \underbrace{N_{ijlm}(c + aD_{lm} + bD_{ij})}_{\text{costs}} \xrightarrow{N_{ijlm}} \max \quad (\text{A1})$$

The first term in equation (A1) refers to the total expected benefit of a job match between a worker in region  $l$  and occupation  $i$  and a vacancy in region  $m$  and occupation  $j$ . For simplicity, we assume that unemployment does not yield any income. Furthermore, workers' search costs are assumed to be relatively small compared with expected returns to search. This implies that income effects from searches for jobs in the other local labor markets can be neglected and, therefore, workers can separately fix their optimal search intensities for each local labor market.

Solving for the optimal search intensity  $N_{ijlm}^*$  yields:

$$N_{ijlm}^* = \begin{cases} f_{jm}^{-1} \cdot \ln \left( \frac{f_{jm} \frac{w}{r}}{c + aD_{lm} + bD_{ij}} \right) & \text{if } f_{jm} \frac{w}{r} \geq c + aD_{lm} + bD_{ij}, \\ 0 & \text{otherwise.} \end{cases} \quad (\text{A2})$$

Thus, the optimal search intensity is a positive function of the ratio of expected gains and the search costs  $f_{jm} \frac{w}{r} / (c + aD_{lm} + bD_{ij})$ . Further derivations show that the optimal search intensity is increasing in wages, while decreasing in interest rate, in application fixed costs, and in the introduced distance parameters.

Taking partial derivative with respect to  $f_{jm}$  yields:

$$\frac{\partial N_{ijlm}^*}{\partial f_{jm}} = f_{jm}^{-2} \left[ 1 - \ln \left( \frac{f_{jm} \frac{w}{r}}{c + aD_{lm} + bD_{ij}} \right) \right]. \quad (\text{A3})$$

It follows from equation (A3) that the optimal search intensity  $N_{ijlm}^*$  is decreasing in the probability to find a job in another region  $f_{jm}$  if the expected benefits are much higher than the costs of search:

$$\frac{\partial N_{ijlm}^*}{\partial f_{jm}} < 0 \quad \text{if} \quad f_{jm} \frac{w}{r} \gg c + aD_{lm} + bD_{ij}. \quad (\text{A4})$$

With the optimal intensity of search  $N_{ijlm}^*$ , the unconditional job finding probability for a local labor market in any region and occupation can be defined. In the 'bulletin board' type of model, the vacancy is filled if it is chosen by at least one worker. We assume that all vacancies in all regions and occupations are known by all job searchers, due to the bulletin board (here, it is allowed that  $i = j$  and  $l = m$ ):

$$V_{jm} = V = \sum_{j=1}^J \sum_{m=1}^M v_{jm}. \quad (\text{A5})$$

If at least one worker chooses a vacancy, then, according to the 'bulletin board' type of model, this vacancy is filled. After all unemployed make their optimal num-

ber of applications in each occupation and region ( $U_{jm} \equiv \sum_{i=1}^I \sum_{l=1}^L N_{ijlm}^* u_{il}$ ), the probability of a particular vacancy not being chosen is equal to:

$$\prod_{i=1}^I \prod_{l=1}^L \left[ \prod_{k=1}^{N_{ijlm}^*} [1 - (V_{jm} - k + 1)^{-1}] \right]^{u_{il}} \approx \prod_{i=1}^I \prod_{l=1}^L \left[ \prod_{k=1}^{N_{ijlm}^*} e \right]^{-\frac{u_{il}}{V_{jm}}} = \exp \left( -\frac{U_{jm}}{V_{jm}} \right). \quad (\text{A6})$$

Consequently, the unconditional job finding rate for each interview that is held in the targeted occupation  $j$  and the targeted region  $m$ , is defined as the number of vacancies per job seeker weighted by their job finding probabilities:

$$f_{jm} = \frac{V_{jm}}{U_{jm}} \left[ 1 - \exp \left( -\frac{U_{jm}}{V_{jm}} \right) \right]. \quad (\text{A7})$$

Based on the previous calculations, a matching function that returns the number of flows from unemployment to employment in an occupation  $i$  and in a region  $l$  can be described:

$$x_{il}(\mathbf{u}, \mathbf{v}) = u_{il} F_{il} = u_{il} \left[ 1 - \prod_{j=1}^J \prod_{m=1}^M (1 - f_{jm})^{N_{ijlm}^*} \right], \quad (\text{A8})$$

where  $\mathbf{u}$  and  $\mathbf{v}$  are the vectors of stocks of unemployed and vacancies in all regions and all occupations.  $F_{il}$  is the probability that an unemployed individual in occupation  $i$  and region  $l$  receives at least one job offer.

This function of matches involves the unemployed and vacancies in all occupations and all regions. Therefore, we can compute regional, occupational, and combined regional-occupational spillover terms as we present it in section 2.1 in the main text.

## Appendix B. Construction of the occupational segments

Table B1.: Assignment of the occupational orders to the occupational segments  
(according to Matthes et al., 2008)

| Occupational segment |                                  | Occupational group (KldB 88) |                                                                                 |
|----------------------|----------------------------------|------------------------------|---------------------------------------------------------------------------------|
| Code                 | Name                             | Code                         | Name                                                                            |
| 101                  | "Green" occupations              | 11                           | Farmers                                                                         |
|                      |                                  | 12                           | Winegrowers                                                                     |
|                      |                                  | 21                           | Livestock farmer                                                                |
|                      |                                  | 22                           | Fish farmer                                                                     |
|                      |                                  | 31                           | Agricultural production manager                                                 |
|                      |                                  | 32                           | Agricultural engineers and advisors                                             |
|                      |                                  | 41                           | Mixed crop and livestock farm laborers                                          |
|                      |                                  | 42                           | Livestock and dairy producers                                                   |
|                      |                                  | 44                           | Pet groomers, animal care workers and related occupations                       |
|                      |                                  | 51                           | Gardeners, horticultural and nursery growers                                    |
|                      |                                  | 52                           | Garden and landscape architects and administrators                              |
|                      |                                  | 53                           | Florists                                                                        |
|                      |                                  | 61                           | Forestry production managers, foresters and hunts-persons                       |
|                      |                                  | 62                           | Forestry laborers                                                               |
|                      |                                  | 421                          | Wine coopers and other wine-processing operators                                |
|                      |                                  | 422                          | Brewers, maltsters and other brewer machine operators                           |
|                      |                                  | 423                          | Other beverage makers, coffee-processing-machine operators, tasters and graders |
|                      |                                  | 424                          | Tobacco preparers, products makers                                              |
| 201                  | Miner/chemical occupations       | 71                           | Miners                                                                          |
|                      |                                  | 72                           | Mining shot firers and blasters                                                 |
|                      |                                  | 81                           | Stone crushers                                                                  |
|                      |                                  | 82                           | Earth, gravel and sand quarry workers                                           |
|                      |                                  | 83                           | Gas and crude oil quarry workers                                                |
|                      |                                  | 91                           | Mineral and stone processing plant operators                                    |
|                      |                                  | 141                          | Chemical products plant and machine operators                                   |
|                      |                                  | 142                          | Chemical laboratory workers                                                     |
|                      |                                  | 143                          | Rubber products machine operators                                               |
|                      |                                  | 144                          | Tire vulcanizers                                                                |
|                      |                                  | 151                          | Plastic products machine operators                                              |
|                      |                                  | 464                          | Shot firers and blasters except mining shot firers                              |
|                      |                                  | 541                          | Power production plant operators                                                |
|                      |                                  | 542                          | Winding-, conveyor- and ropeway-machine operators                               |
|                      |                                  | 547                          | Machine maintenance operators, machinists' assistants                           |
|                      |                                  | 548                          | Boilerpersons, incinerators and related plant operators                         |
|                      |                                  | 604                          | Cartographers and survey engineers                                              |
|                      |                                  | 605                          | Mining, metallurgy, foundry engineers                                           |
|                      |                                  | 624                          | Survey engineering technicians                                                  |
|                      |                                  | 625                          | Mining, metallurgy, foundry engineering technicians                             |
|                      |                                  | 626                          | Chemical and physical engineering technicians                                   |
|                      |                                  | 631                          | Agronomy, forestry and life science technicians                                 |
|                      |                                  | 632                          | Physical and mathematical science technicians                                   |
|                      |                                  | 633                          | Chemical science technicians                                                    |
| 202                  | Glass, ceramic, paper production | 111                          | Brick-maker and other stoneware makers                                          |
|                      |                                  | 121                          | Ceramics plant operators                                                        |
|                      |                                  | 131                          | Frit makers, glass vitrifiers                                                   |
|                      |                                  | 132                          | Hollow glassware makers                                                         |

continued on the next page

| Occupational segment |                             | Occupational group (KldB 88) |                                                                              |
|----------------------|-----------------------------|------------------------------|------------------------------------------------------------------------------|
| Code                 | Name                        | Code                         | Name                                                                         |
|                      |                             | 133                          | Flat glass makers                                                            |
|                      |                             | 134                          | Gaffer                                                                       |
|                      |                             | 135                          | Glass cutters, grinders and refiners                                         |
|                      |                             | 161                          | Pulp and cellulose plant operators                                           |
|                      |                             | 162                          | Packaging makers                                                             |
|                      |                             | 163                          | Bookbinding workers                                                          |
|                      |                             | 164                          | Other paper products machine operators                                       |
|                      |                             | 171                          | Type setters, pre-press workers                                              |
|                      |                             | 172                          | Stereotypers and electrotypers                                               |
|                      |                             | 173                          | Book printers, letterpress                                                   |
|                      |                             | 174                          | Flat screen, gravure and intaglio printers                                   |
|                      |                             | 175                          | Special, silk-screen printers                                                |
|                      |                             | 176                          | Hecto- and mimeo-graphers                                                    |
|                      |                             | 177                          | Printer's hands                                                              |
|                      |                             | 514                          | Glass, ceramics and related decorative painters, glass engravers and etchers |
|                      |                             | 634                          | Photo laboratory technicians                                                 |
|                      |                             | 837                          | Photographers, camera and retouching operators                               |
| 203                  | Textile, leather production | 331                          | Spinner, fibre-preparer                                                      |
|                      |                             | 332                          | Spoolers, twistors, rope-makers                                              |
|                      |                             | 341                          | Weaving- and knitting-machine preparers                                      |
|                      |                             | 342                          | Weavers and weaving-machine operators                                        |
|                      |                             | 343                          | Tufted textile-, fur- and leather-products makers                            |
|                      |                             | 344                          | Knitters and knitting-machine operators                                      |
|                      |                             | 345                          | Felt and hat body makers                                                     |
|                      |                             | 346                          | Textile braiders                                                             |
|                      |                             | 351                          | Tailors and dressmakers                                                      |
|                      |                             | 352                          | Sewers and sewing-machine operators                                          |
|                      |                             | 353                          | Lingerie tailors and sewers                                                  |
|                      |                             | 354                          | Embroiderers                                                                 |
|                      |                             | 355                          | Hatters and cap makers                                                       |
|                      |                             | 356                          | Sewer and sewing-machine operators otherwise undisclosed                     |
|                      |                             | 357                          | Other textile-products makers                                                |
|                      |                             | 361                          | Textile dyer and dyeing-machine operators                                    |
|                      |                             | 362                          | Textile bleaching-, cleaning-machine operators and other finishers           |
|                      |                             | 371                          | Tanners, cutgut string makers and other leather-preparing-machine operators  |
|                      |                             | 372                          | Shoe-makers                                                                  |
|                      |                             | 373                          | Shoemaking-machine operators                                                 |
|                      |                             | 374                          | Saddlers, truss makers and other coarse-leather-products makers              |
|                      |                             | 375                          | Purse, hand bag and other fine-leather-products makers                       |
|                      |                             | 376                          | Leather garment makers and other leather-products machine operators          |
|                      |                             | 377                          | Leather glove makers                                                         |
|                      |                             | 378                          | Pelt dressers, furriers and other fur-products makers                        |
|                      |                             | 543                          | Pump-, compressor-, assembly line-, boring and other machines operators      |
|                      |                             | 549                          | Machine-tool setters and setter-operators no further specified               |
|                      |                             | 627                          | Other production technicians                                                 |
|                      |                             | 629                          | Forepersons and other operations managers                                    |
|                      |                             | 931                          | Launderers and ironers                                                       |
|                      |                             | 932                          | Textile cleaner, dyers, chemical purifiers                                   |
| 204                  | Metal producer              | 191                          | Ore and metal furnace operators, metal melters                               |
|                      |                             | 192                          | Rolling-mill operators                                                       |
|                      |                             | 193                          | Metal drawers and extruders                                                  |
|                      |                             | 201                          | Moulders and coremakers                                                      |

continued on the next page

| Occupational segment |                  | Occupational group (KldB 88) |                                                                                       |
|----------------------|------------------|------------------------------|---------------------------------------------------------------------------------------|
| Code                 | Name             | Code                         | Name                                                                                  |
|                      |                  | 202                          | Casters                                                                               |
|                      |                  | 203                          | Casters of semi-finished products and other mold casters                              |
|                      |                  | 211                          | Sheet metal pressers, drawer and puncher                                              |
|                      |                  | 212                          | Wire moulder, cable splicers                                                          |
|                      |                  | 213                          | Other metal moulders non cutting deformation                                          |
|                      |                  | 221                          | Metal lathe operators                                                                 |
|                      |                  | 222                          | Metal milling cutters                                                                 |
|                      |                  | 223                          | Metal planers                                                                         |
|                      |                  | 224                          | Metal borers                                                                          |
|                      |                  | 225                          | Metal grinders                                                                        |
|                      |                  | 226                          | Other metal-cutting occupations                                                       |
|                      |                  | 231                          | Metal polishers                                                                       |
|                      |                  | 232                          | Engravers, chasers                                                                    |
|                      |                  | 233                          | Metal finishers                                                                       |
|                      |                  | 234                          | Galvanizers, metal colorers                                                           |
|                      |                  | 235                          | Enamelers, zinc platers and other metal surface finishers                             |
|                      |                  | 241                          | Welder, oxy-acetylene cutters                                                         |
|                      |                  | 242                          | Solderers                                                                             |
|                      |                  | 243                          | Riveters                                                                              |
|                      |                  | 244                          | Metal bonders and other metal connectors                                              |
|                      |                  | 251                          | Steel-, black-, hammer-smiths and forging press workers                               |
|                      |                  | 252                          | Tank and container builders, coppersmiths and related occupations                     |
|                      |                  | 261                          | Tinsmiths                                                                             |
|                      |                  | 262                          | Plumbers                                                                              |
|                      |                  | 263                          | Pipe and tube fitters                                                                 |
|                      |                  | 270                          | Locksmiths and fitters, not further specified                                         |
|                      |                  | 271                          | Building fitters                                                                      |
|                      |                  | 272                          | Sheet metal worker, plastics fitters                                                  |
|                      |                  | 273                          | Engine fitters                                                                        |
|                      |                  | 274                          | Plant and maintenance fitters                                                         |
|                      |                  | 275                          | Steel construction fitters, steel ship builders                                       |
|                      |                  | 281                          | Motor vehicle repairers                                                               |
|                      |                  | 282                          | Agricultural machinery repairers                                                      |
|                      |                  | 283                          | Aircraft mechanics                                                                    |
|                      |                  | 284                          | Precision mechanics                                                                   |
|                      |                  | 285                          | Other mechanics                                                                       |
|                      |                  | 286                          | Watch-, clock-makers                                                                  |
|                      |                  | 291                          | Toolmakers, instrument mechanics                                                      |
|                      |                  | 301                          | Precious fitters otherwise undisclosed                                                |
|                      |                  | 302                          | Precious metal smiths                                                                 |
|                      |                  | 303                          | Dental technicians                                                                    |
|                      |                  | 304                          | Ophthalmic opticians                                                                  |
|                      |                  | 323                          | Metal plant operators no further specification                                        |
|                      |                  | 502                          | Pattern and mold carpenters                                                           |
|                      |                  | 601                          | Mechanical and automotive engineers                                                   |
|                      |                  | 621                          | Mechanical engineering technicians                                                    |
|                      |                  | 686                          | Filling station attendants                                                            |
| 205                  | Electricians     | 311                          | Electrical fitters, mechanics                                                         |
|                      |                  | 312                          | Telecommunications mechanics, craftsmen                                               |
|                      |                  | 313                          | Electric motor, transformer fitters                                                   |
|                      |                  | 314                          | Electrical appliance fitters                                                          |
|                      |                  | 315                          | Radio, sound equipment mechanics                                                      |
|                      |                  | 321                          | Electrical appliance and equipment assemblers                                         |
|                      |                  | 322                          | Metal-, rubber-, plastic-, paperboard-, textile and related products assemblers       |
|                      |                  | 602                          | Electrical and electronics engineers                                                  |
|                      |                  | 622                          | Electrical, electronics and telecommunications engineering technicians                |
| 206                  | Wood occupations | 774                          | Computer scientists, equipment operators, computing and data processing professionals |
|                      |                  | 181                          | Wood-processing-plant operators                                                       |

continued on the next page

| Occupational segment |                              | Occupational group (KldB 88) |                                                                                                       |
|----------------------|------------------------------|------------------------------|-------------------------------------------------------------------------------------------------------|
| Code                 | Name                         | Code                         | Name                                                                                                  |
|                      |                              | 182                          | Woodworking machine setters and setter-operators, and appropriate occupations                         |
|                      |                              | 183                          | Wood products, brush-, cork-maker                                                                     |
|                      |                              | 184                          | Basketry weavers and wicker worker                                                                    |
|                      |                              | 305                          | Musical instrument makers                                                                             |
|                      |                              | 306                          | Doll, model makers, taxidermists                                                                      |
|                      |                              | 485                          | Glaziers                                                                                              |
|                      |                              | 501                          | Cabinetmakers, carpenters and joiners                                                                 |
|                      |                              | 503                          | Cartwrights, wheelwrights, coopers and tubbers                                                        |
|                      |                              | 504                          | Other wood-products makers, Boat-, glider- and wooden sports-equipment-building experts               |
|                      |                              | 512                          | Goods painters and varnishers                                                                         |
|                      |                              | 513                          | Wood surface finishers, veneers                                                                       |
| 207                  | Construction                 | 112                          | Cement and concrete block makers                                                                      |
|                      |                              | 441                          | Bricklayers and masons                                                                                |
|                      |                              | 442                          | Steel fixers, concreters                                                                              |
|                      |                              | 451                          | Carpenters                                                                                            |
|                      |                              | 452                          | Roofers                                                                                               |
|                      |                              | 453                          | Scaffolders                                                                                           |
|                      |                              | 461                          | Paviors, pavers                                                                                       |
|                      |                              | 462                          | Road building experts                                                                                 |
|                      |                              | 463                          | Track building experts                                                                                |
|                      |                              | 465                          | Land improvement, maintenance and hydraulic structure building experts                                |
|                      |                              | 466                          | Well, duct and other civil engineering building experts                                               |
|                      |                              | 471                          | Earth-moving laborers                                                                                 |
|                      |                              | 472                          | Building construction labourers and other construction and maintenance laborers otherwise undisclosed |
|                      |                              | 481                          | Stuccoers, plasterers                                                                                 |
|                      |                              | 482                          | Insulators and proofers                                                                               |
|                      |                              | 483                          | Tile setters                                                                                          |
|                      |                              | 484                          | Stove setters and air heating fitters                                                                 |
|                      |                              | 486                          | Composition floor and terrazzo layers                                                                 |
|                      |                              | 491                          | Interior decorators, carpet and parquet layers                                                        |
|                      |                              | 492                          | Upholsterers, mattresses makers                                                                       |
|                      |                              | 511                          | Construction painters, wall-paperers, varnishers                                                      |
|                      |                              | 544                          | Crane and hoist plant operators                                                                       |
|                      |                              | 545                          | Earth-moving and related plant operators                                                              |
|                      |                              | 546                          | Construction plant operators                                                                          |
|                      |                              | 603                          | Architects, civil and structural engineers                                                            |
|                      |                              | 623                          | Civil engineering technicians                                                                         |
|                      |                              | 635                          | Draftspersons                                                                                         |
|                      |                              | 716                          | Construction and maintenance laborers: roads, dams, bridges and similar constructions                 |
|                      |                              | 836                          | Interior architects, visual merchandiser                                                              |
| 301                  | Hotel/restaurant occupations | 391                          | Bakers and baked-goods, cereal- and chocolate-products machine operators                              |
|                      |                              | 392                          | Pastry-cooks and confectionery makers                                                                 |
|                      |                              | 401                          | Butchers and stickers                                                                                 |
|                      |                              | 402                          | Meat- and sausage-processing-machine operators                                                        |
|                      |                              | 403                          | Fish-processing-machine operators                                                                     |
|                      |                              | 411                          | Cooks                                                                                                 |
|                      |                              | 412                          | Ready-made meals-, fruit- and vegetable-processing-machine operators                                  |
|                      |                              | 431                          | Dairy-products machine operators, butter-, lard- and margarine makers                                 |
|                      |                              | 432                          | Grain- and spice-milling-machine operators                                                            |
|                      |                              | 433                          | Sugar-production machine operators, chocolate, sweets and ice-cream makers                            |

continued on the next page

| Occupational segment |                                | Occupational group (KldB 88) |                                                                                           |
|----------------------|--------------------------------|------------------------------|-------------------------------------------------------------------------------------------|
| Code                 | Name                           | Code                         | Name                                                                                      |
|                      |                                | 702                          | Travel agency clerks, attendants, stewards, consultants, organizers and guides            |
|                      |                                | 805                          | Disinfectors, morticians, meat and other health inspectors                                |
|                      |                                | 911                          | Hoteliers, innkeepers, restaurateurs and management assistants in hotels and restaurants  |
|                      |                                | 912                          | Waiters, waitresses, stewards, stewardesses and busepersons                               |
|                      |                                | 913                          | Porters, bartenders and other hotel and restaurant attendants                             |
|                      |                                | 921                          | Housekeepers and related workers                                                          |
|                      |                                | 922                          | Energy and other consumer advisors                                                        |
|                      |                                | 923                          | Valets, chambermaids and other housekeeping attendants                                    |
|                      |                                | 933                          | Dishwashers, room and domestic cleaners                                                   |
|                      |                                | 934                          | Windows, frontages and buildings cleaners                                                 |
|                      |                                | 935                          | Sweepers, streets and sewerages cleaners, dustmen and other waste disposal workers        |
|                      |                                | 936                          | Car washers, vehicle cleaners, car and vehicle carers                                     |
|                      |                                | 937                          | Machinery, plant, tube and container cleaners                                             |
| 302                  | Storage/ transport occupations | 521                          | Products testers, sorters otherwise undisclosed                                           |
|                      |                                | 522                          | Product packagers, balers, wrappers, qualifiers and other loading agents                  |
|                      |                                | 701                          | Logistics managers and transport clerks                                                   |
|                      |                                | 711                          | Locomotive engine, tram and subway drivers                                                |
|                      |                                | 712                          | Railway brake, signal and switch operators, shunters and railway guards and conductors    |
|                      |                                | 713                          | Other brake, signal and switch operators, transport guides and conductors, fleet managers |
|                      |                                | 714                          | Car, taxi, bus, (heavy) truck and other motor vehicle drivers                             |
|                      |                                | 715                          | Cabby                                                                                     |
|                      |                                | 721                          | Navigators, nautical ships' officers and pilots                                           |
|                      |                                | 722                          | Technical ship's officers, engineers, technicians and machinists                          |
|                      |                                | 723                          | Seagoing ships' deck crews                                                                |
|                      |                                | 724                          | Inland boatmen and related ships' decks crews                                             |
|                      |                                | 725                          | Ferryman, lock-masters, coastguards and other water traffic occupations                   |
|                      |                                | 726                          | Aircraft pilots, flight engineers and other air traffic occupations                       |
|                      |                                | 732                          | Mail carriers, sorting clerks, porters and deliverers                                     |
|                      |                                | 733                          | Radio operators                                                                           |
| 303                  | Merchandise occupations        | 741                          | Stocks administrators and clerks                                                          |
|                      |                                | 742                          | Lift, lifting-trucks and other materials handling equipment operators                     |
|                      |                                | 743                          | Longshoremen, furniture removers                                                          |
|                      |                                | 744                          | Stock, loading and other transport workers                                                |
|                      |                                | 681                          | Wholesaler, retail salespersons and buying agents                                         |
|                      |                                | 682                          | Shop, stall and market salespersons and demonstrators                                     |
|                      |                                | 683                          | Publishers, management assistants in publishing and booksellers                           |
|                      |                                | 684                          | Chemists in drugstores                                                                    |
|                      |                                | 685                          | Chemist's assistants in pharmacies                                                        |
|                      |                                | 687                          | Commercial sales representatives and sales agents                                         |
|                      |                                | 691                          | Banking experts including tellers, finance clerks as well as finance dealers and brokers  |
|                      |                                | 692                          | Building society experts including representatives as well as clerks                      |

continued on the next page



| Occupational segment |                         | Occupational group (KldB 88) |                                                                                              |
|----------------------|-------------------------|------------------------------|----------------------------------------------------------------------------------------------|
| Code                 | Name                    | Code                         | Name                                                                                         |
|                      |                         | 693                          | Health insurance experts including representatives as well as clerks, not social security    |
|                      |                         | 694                          | Life, property insurance experts including representative as well as clerks                  |
|                      |                         | 704                          | Finance, stock, trade, ship, real estate, insurance brokers                                  |
|                      |                         | 705                          | Landlords, hirers, agents, bookers, auctioneers                                              |
|                      |                         | 706                          | Cashiers, ticket agents, Debt- and vending-machine money collectors and ticket inspectors    |
|                      |                         | 773                          | Cashiers and ticket clerks                                                                   |
|                      |                         | 855                          | Dietitians, nutritionists and pharmacy technicians                                           |
|                      |                         | 901                          | Hairdressers, barbers, wig-makers and related workers                                        |
|                      |                         | 902                          | Beauticians, manicurists, pedicurists and related workers                                    |
| 304                  | White collar worker     | 703                          | Advertising and public relations experts                                                     |
|                      |                         | 734                          | Telephone switchboard operators                                                              |
|                      |                         | 751                          | Entrepreneurs, managing directors and division managers                                      |
|                      |                         | 752                          | Management, personnel and other business consultants                                         |
|                      |                         | 753                          | Financial, tax accountants and accounting clerks                                             |
|                      |                         | 762                          | Senior and administrative state officials                                                    |
|                      |                         | 763                          | Senior and administrative officials of humanitarian and other special-interest organizations |
|                      |                         | 771                          | Calculators, calculating and counting clerks                                                 |
|                      |                         | 772                          | Bookkeepers                                                                                  |
|                      |                         | 781                          | Office clerks, otherwise undisclosed                                                         |
|                      |                         | 782                          | Secretaries, stenographers and typists                                                       |
|                      |                         | 783                          | Data entry operators                                                                         |
|                      |                         | 784                          | Scribes and other office hands                                                               |
|                      |                         | 811                          | Judges and prosecutors                                                                       |
|                      |                         | 812                          | Law officers                                                                                 |
|                      |                         | 813                          | Lawyers, notaries, legal representatives, advisors and other legal professionals             |
|                      |                         | 814                          | Executory officers, prison guards                                                            |
|                      |                         | 863                          | Housemasters, social pedagogue, deacons                                                      |
|                      |                         | 881                          | Economists, psychologists, sociologists, political scientists, statisticians                 |
| 305                  | Security occupations    | 607                          | Industrial and other operating engineers                                                     |
|                      |                         | 628                          | Industrial and other operating technicians                                                   |
|                      |                         | 791                          | Factories security offices, store, hotel and other detectives                                |
|                      |                         | 792                          | Watchpersons, custodians, attendants and related workers                                     |
|                      |                         | 793                          | Door-, gatekeepers and caretakers                                                            |
|                      |                         | 794                          | Menials, bellmen, ushers and groundkeepers                                                   |
|                      |                         | 801                          | Soldiers, border guards, police officers                                                     |
|                      |                         | 802                          | Firefighters                                                                                 |
|                      |                         | 803                          | Safety inspectors, trade controllers, gauging, and environmental protection officers         |
|                      |                         | 804                          | Chimney sweepers                                                                             |
| 306                  | Social/care occupations | 861                          | Social work, welfare, health care professionals and workers; geriatric nurses                |
|                      |                         | 862                          | Housemasters, social pedagogue, deacons                                                      |
|                      |                         | 864                          | Kindergarten teachers, child care workers and pediatric nurses                               |
|                      |                         | 891                          | Bishops, pastors, chaplains and other religious professionals                                |
|                      |                         | 892                          | Nuns, friars and other religious associate professionals                                     |
|                      |                         | 893                          | Sextons, cantors and other religious assistants                                              |
| 307                  | Medical occupations     | 851                          | Non-medical practitioners, psychotherapists                                                  |

continued on the next page

| Occupational segment |                     | Occupational group (KldB 88) |                                                                                               |  |  |
|----------------------|---------------------|------------------------------|-----------------------------------------------------------------------------------------------|--|--|
| Code                 | Name                | Code                         | Name                                                                                          |  |  |
|                      |                     | 852                          | Masseurs, physiotherapists and health care professionals                                      |  |  |
|                      |                     | 853                          | Nurses, midwives, nursing and midwifery associate professionals                               |  |  |
|                      |                     | 854                          | Paramedics and nursing auxiliary workers                                                      |  |  |
|                      |                     | 856                          | Doctor's receptionists and assistants                                                         |  |  |
|                      |                     | 857                          | Medical technical, laboratory, radiological assistants                                        |  |  |
| 308                  | Doctors             | 841                          | Medical doctors                                                                               |  |  |
|                      |                     | 842                          | Dentists                                                                                      |  |  |
|                      |                     | 843                          | Veterinaries                                                                                  |  |  |
|                      |                     | 871                          | University, college professors and related teaching professionals                             |  |  |
|                      |                     | 872                          | Grammar school teacher and related teaching professionals                                     |  |  |
|                      |                     | 873                          | Primary, secondary school, special education teachers and related teaching professionals      |  |  |
| 309                  | Teacher             | 874                          | Vocational, professional college teachers and related teaching professionals                  |  |  |
|                      |                     | 877                          | Driving, flying, hygienic and other instructors, otherwise undisclosed                        |  |  |
|                      |                     | 101                          | Stone splitters, cutters and carvers                                                          |  |  |
|                      |                     | 102                          | Precious-stone workers, jewel preparers                                                       |  |  |
|                      |                     | 831                          | Composers, music directors and musicians                                                      |  |  |
|                      |                     | 832                          | Film, stage and related directors, actors, singers and dancers                                |  |  |
|                      |                     | 833                          | Sculptors, painters, graphic and related artists                                              |  |  |
|                      |                     | 834                          | Decorators, sign painters                                                                     |  |  |
|                      |                     | 835                          | Set designer, light board, image and sound recording engineers, technicians and operators     |  |  |
|                      |                     | 838                          | Clowns, magicians, acrobats, professional sports-persons, mountain guides and models          |  |  |
|                      |                     | 875                          | Art, music and voice teachers and related teaching professionals, otherwise undisclosed       |  |  |
| 310                  | Artists/Athletes    | 876                          | PE teachers, related teaching professionals, skiing and other sports instructors              |  |  |
|                      |                     | 606                          | Other production engineers                                                                    |  |  |
|                      |                     | 611                          | Chemists, chemical engineers                                                                  |  |  |
|                      |                     | 612                          | Physicists, physics engineers, mathematicians                                                 |  |  |
|                      |                     | 844                          | Pharmacists                                                                                   |  |  |
|                      |                     | 883                          | Biologists, geographers, meteorologists and other natural scientists, otherwise undisclosed   |  |  |
| 311                  | Natural scientists  |                              |                                                                                               |  |  |
|                      |                     |                              |                                                                                               |  |  |
|                      |                     |                              |                                                                                               |  |  |
|                      |                     |                              |                                                                                               |  |  |
| 312                  | Humanities scholars | 821                          | Authors, journalists, editors and announcers                                                  |  |  |
|                      |                     | 822                          | Interpreters, translators                                                                     |  |  |
|                      |                     | 823                          | Librarians, archivists, documentalists, curators, library and filing clerks                   |  |  |
|                      |                     | 882                          | Philologists, historians, philosophers and other humanities scientists, otherwise undisclosed |  |  |
| 999                  | Others              | 531                          | Helper no further specified                                                                   |  |  |
|                      |                     | 982                          | Threshold workers, volunteers with occupation still to be specified                           |  |  |
|                      |                     | 983                          | Job-seekers with occupation still to be specified                                             |  |  |

## Appendix C. Placebo Test of the Occupational Topology

As shown above, the usage of the (contiguity) occupational weights matrix adopted from Matthes, Burkert, and Biersack (2008) delivers robust and significant estimates for occupational spillovers. The estimation relies on the assumption that the constructed occupational topology has similar properties like regional topologies. However, one important difference is that regional topologies are in fact observable; their contiguity, distances and related measures between region pairs are physical.

Though as objective as possible, our occupational topology nevertheless relies on concepts of human perception and multidimensional definitions of tasks that cannot be mapped like it is possible for regions. This concerns cannot be fully eliminated, but we can at least test which estimation results would be produced by arbitrary defined occupational topologies as basis for the occupational spillover effects.

Analogous to the methodology in Stops (2014), we conduct an additional indirect validity test for our occupational weights matrix to verify that our estimated effects of occupational spillovers are non-random. In doing so, we construct 500 random matrices of ‘occupational topologies’ that fulfill the following conditions:

- contain the same amount of occupational segments (implying same size of segments as in the empirical ‘topology’);
- are symmetric;
- contain zeros at their main diagonal; and
- prevent occupations from the same empirical occupational segment to be in one random occupational segment.

Next, we re-estimate the fixed effects model of the occupational spillover effects in the matching function using our (contiguity) occupational weights matrix and the constructed random matrices. The regression equation is specified like specification (FE12) but without the regional-occupational spillover terms, because we prefer for this robustness check a specification that clearly disentangles the regional and the occupational spillover effect. The results of the estimation are displayed in figure C1. The horizontal lines in both charts of the figure correspond to the estimation result based on the empirical ‘occupational topology’ based on the classification of occupations into segments by Matthes et al. (2008). The solid line corresponds to the point estimates, whereas the dashed lines around correspond to the 95% confidence intervals.

The point estimates and confidence intervals for the random matrices are substantially and significantly different from the estimates based on (contiguity) occupational weights matrix. Although the size of the coefficients differs substantially, the coefficients from the estimations with random and empirical weight matrices exhibit same direction of influence on the matching technology. In particular, the sign of the coefficient of the randomly weighted unemployed is negative, whereas the sign of the coefficient of the randomly weighted vacancies is positive. Thus, we conclude that the estimation of occupational spillovers described in section 4 captures relationships due to tasks similarities within occupational segments that result in non-random occupational mobility.

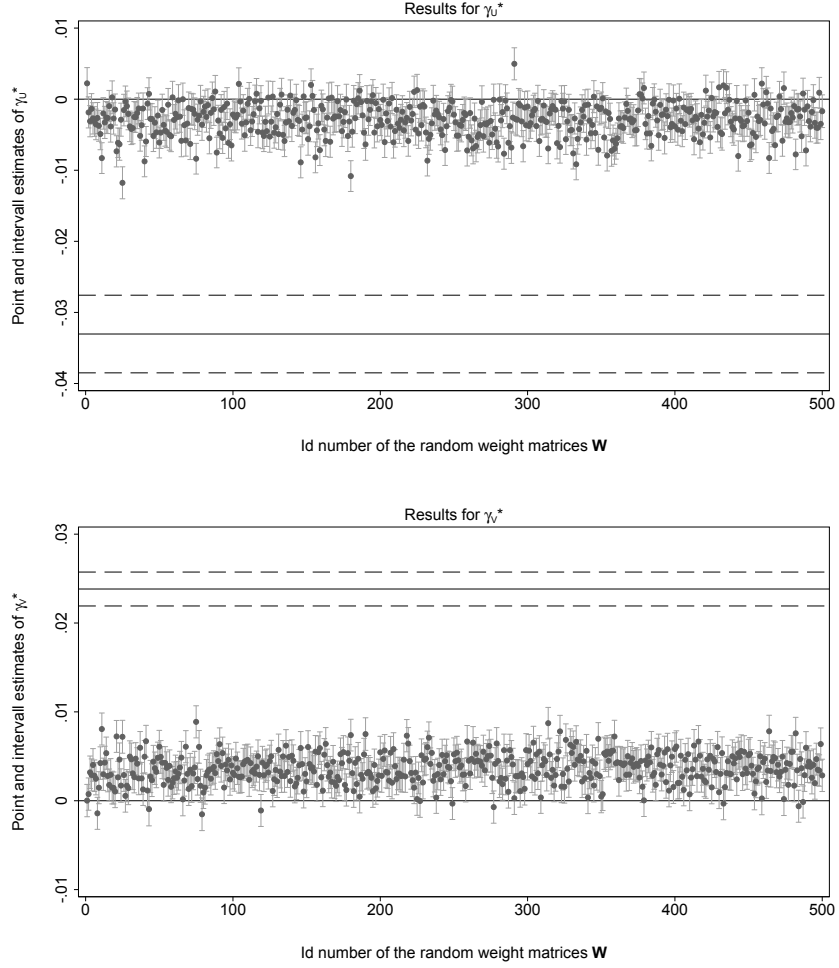

**Figure C1.** Test of 500 random ‘occupational topology’ matrices in the estimation of the effect of occupational spillovers on matching efficiency.

Notes: Estimates are based on the empirical weight matrix and 500 randomly selected weight matrices. The solid horizontal lines mark the point estimates and the dotted horizontal lines below and above mark the 95%-confidence interval estimates of the occupational spillovers  $\gamma_{U_o}$  and  $\gamma_{V_o}$  based on the empirical weights matrix. The dots and the vertical lines mark the point estimates and the 95%-confidence interval estimates of the occupational spillovers  $\gamma_{U_o}$  and  $\gamma_{V_o}$  based on randomly selected weight matrices of non-similar occupational groups.

## References

- Burda, M. C., & Profit, S. (1996). Matching across Space: Evidence on Mobility in the Czech Republic. *Labour Economics*, 3, 255-278.
- Hall, R. E. (1979). A Theory of the Natural Unemployment Rate and the Duration of Unemployment. *Journal of Monetary Economics*, 5, 153-169.
- Matthes, B., Burkert, C., & Biersack, W. (2008). *Berufssegmente: Eine empirisch fundierte Neuabgrenzung vergleichbarer beruflicher Einheiten*. (IAB-Discussion Paper No. 35, IAB, Nuremberg)
- Pissarides, C. A. (1979). Job Matchings with State Employment Agencies and Random Search [Journal Article]. *The Economic Journal*, 89(356), 818-833.
- Stops, M. (2014). Job Matching Across Occupational Labour Markets. *Oxford Economic Papers*, 66(4), 940-958.
